# Supplementary material for: Effect of the Landscape on Insect Pests and Associated Natural Enemies in Greenhouses Crops: The Strawberry Study Case
Source: MDPI journal article supplement (doi:10.3390/insects14030302), 2023-03-21
Supplement: s1 [file s1]

## Supplementary Materials:

**Supplementary Table S1.** Response and variables analyzed in the three published studies on the effect of surrounding landscape on insects in greenhouses.

| Response variable                                                             | Landscape factors                                                    | Buffer size around the greenhouses (m) | Effect of landscape factor | Crop       | References                   |
|-------------------------------------------------------------------------------|----------------------------------------------------------------------|----------------------------------------|----------------------------|------------|------------------------------|
| Abundance of mirid predator <i>Macrolophus spp.</i>                           | % Cover of fallow                                                    | 100 & 300                              | Increased                  | Tomato     | Aviron <i>et al.</i> , 2016  |
|                                                                               | Connectivity of fallow                                               | 100                                    | Increased                  |            |                              |
|                                                                               | % cover of grassy orchards                                           | 200 & 300                              | Decreased                  |            |                              |
|                                                                               | Connectivity of orchards                                             | 200 & 300                              | Decreased                  |            |                              |
| Abundance of mirid predator <i>Dicyphus spp.</i>                              | % Cover of grassy orchards                                           | 100                                    | Decreased                  | Watermelon | Dong <i>et al.</i> , 2019    |
| Vulnerability <sup>1</sup>                                                    | % woodland                                                           | 500                                    | Decreased                  |            |                              |
| Active primary parasitism                                                     | % woodland                                                           | 1000                                   | Increased                  |            |                              |
| Hyperparasitoid richness                                                      | % woodland                                                           | 500                                    | Decreased                  |            |                              |
| Primary parasitoid richness                                                   | % vegetable land <sup>2</sup>                                        | 1000                                   | Decreased                  |            |                              |
| Aphid mortality                                                               | % vegetable, %orchard, % grassland, % woodland, % water, and % urban | 500, 1000, 2000 & 3000                 | Not significant            | Tomato     | Ardanuy <i>et al.</i> , 2022 |
| Early colonisation of mirid predator <i>Macrolophus pygmaeus</i> <sup>3</sup> | % herbaceous semi-natural cover                                      | 250                                    | Increased <sup>3</sup>     |            |                              |

1 : Mean number of hyperparasitoid per primary parasitoid species ; 2: Vegetable contained protected fields, e.g. greenhouses in which vegetable were usually planted; 3 : In interaction with the the presence of *Calendula* banker plants inside the greenhouses.

**Supplementary Table S2.** Description of the 32 monitored greenhouse strawberry crops.

| <b>Greenhouse ID</b> | <b>Department</b> | <b>Greenhouse openness degree</b> | <b>Number of plants sampled at 1<sup>st</sup> session</b> | <b>Number of plants sampled at 2<sup>nd</sup> session</b> |
|----------------------|-------------------|-----------------------------------|-----------------------------------------------------------|-----------------------------------------------------------|
| 1                    | 24                | Closed                            | 28                                                        | 26                                                        |
| 2                    | 47                | Closed                            | 30                                                        | 30                                                        |
| 3                    | 47                | Closed                            | 30                                                        | 30                                                        |
| 4                    | 47                | Open                              | 27                                                        | 21                                                        |
| 5                    | 33                | Closed                            | 48                                                        | 25                                                        |
| 6                    | 47                | Closed                            | 48                                                        | 30                                                        |
| 7                    | 47                | Closed                            | 32                                                        | Not sampled                                               |
| 8                    | 47                | Open                              | Not sampled                                               | 25                                                        |
| 9                    | 47                | Open                              | 50                                                        | 34                                                        |
| 10                   | 47                | Closed                            | 21                                                        | 21                                                        |
| 11                   | 24                | Open                              | 21                                                        | Not sampled                                               |
| 12                   | 24                | Open                              | Not sampled                                               | 21                                                        |
| 13                   | 47                | Open                              | 45                                                        | 30                                                        |
| 14                   | 47                | Open                              | 21                                                        | 30                                                        |
| 15                   | 47                | Open                              | 41                                                        | 40                                                        |
| 16                   | 47                | Open                              | 27                                                        | 40                                                        |
| 17                   | 47                | Open                              | 35                                                        | 40                                                        |
| 18                   | 47                | Open                              | 30                                                        | Not sampled                                               |
| 19                   | 47                | Closed                            | Not sampled                                               | 30                                                        |
| 20                   | 24                | Closed                            | 24                                                        | 30                                                        |
| 21                   | 47                | Open                              | 27                                                        | 30                                                        |
| 22                   | 47                | Open                              | 48                                                        | 30                                                        |
| 23                   | 47                | Closed                            | 41                                                        | 30                                                        |
| 24                   | 47                | Closed                            | 30                                                        | 30                                                        |
| 25                   | 47                | Closed                            | 40                                                        | 30                                                        |
| 26                   | 47                | Open                              | 34                                                        | 26                                                        |
| 27                   | 47                | Closed                            | 21                                                        | Not sampled                                               |
| 28                   | 47                | Closed                            | Not sampled                                               | 30                                                        |
| 29                   | 47                | Closed                            | 40                                                        | 30                                                        |
| 30                   | 47                | Closed                            | 22                                                        | 31                                                        |
| 31                   | 47                | Open                              | 40                                                        | 34                                                        |
| 32                   | 47                | Closed                            | 20                                                        | 25                                                        |

**Supplementary Table S3:** Pest management practices used by growers in the 32 monitored greenhouses.

|     | <b>Release of<br/>aphid predators</b> | <b>Release of aphid<br/>parasitoids</b> | <b>Release of<br/>thrips predators</b> | <b>Use of<br/>insecticides</b> |
|-----|---------------------------------------|-----------------------------------------|----------------------------------------|--------------------------------|
| Yes | 7                                     | 9                                       | 31                                     | 30                             |
| No  | 25                                    | 23                                      | 1                                      | 2                              |

**Supplementary Table S4:** Variance Inflation Factors (VIFs) between covariates considered in the statistical modelling.

| Variables                            | VIF values    |              |          |
|--------------------------------------|---------------|--------------|----------|
|                                      | run1          | run2         | run3     |
| % Cereal crop                        | 10.116        | <b>7.097</b> | Excluded |
| % Oleaginous crop                    | 4.998         | 2.929        | 2.043    |
| % Vegetable crop                     | 1.671         | 1.666        | 1.593    |
| % Orchard                            | 6.338         | 4.917        | 2.525    |
| % Semi-natural habitat and grassland | 5.478         | 5.420        | 2.039    |
| % Woodland                           | 5.718         | 5.015        | 1.931    |
| % Urban                              | 5.286         | 2.760        | 2.512    |
| % Bare ground                        | 3.320         | 3.151        | 2.387    |
| % Water                              | 4.056         | 2.704        | 2.641    |
| Shannon diversity index              | 2.974         | 2.856        | 2.366    |
| Number of land cover types           | 2.768         | 2.331        | 2.130    |
| Number of patches                    | 46.648        | 3.058        | 2.876    |
| Mean patch surface                   | <b>37.408</b> | Excluded     |          |
| log (Length of hedges)               | 4.115         | 3.232        | 2.691    |
